# Supplementary material for: Effectiveness of Ozonation for Improving the Microbiological Safety of Fresh-Cut Parsley (Petroselinum crispum) Leaves
Source: MDPI journal article supplement (doi:10.3390/app13158946), 2023-08-03
Supplement: s1 [file s1]

Table S1. Microorganisms number during 15 minutes ozonation process with different ozone concentration ( 0.5 mg L<sup>-1</sup> and 1.5 mg L<sup>-1</sup>)

| Microorganisms<br>from parsley      | microorganisms number [CFU ml <sup>-1</sup> ] during process time [min]; R: reduction of microorganisms number [%] |                                                            |                                                            |                                                            |                                                             |                                                                 |                                                            |                                                             |                                                            |                                                             |                                                            |
|-------------------------------------|--------------------------------------------------------------------------------------------------------------------|------------------------------------------------------------|------------------------------------------------------------|------------------------------------------------------------|-------------------------------------------------------------|-----------------------------------------------------------------|------------------------------------------------------------|-------------------------------------------------------------|------------------------------------------------------------|-------------------------------------------------------------|------------------------------------------------------------|
|                                     | before                                                                                                             |                                                            | after ozonation                                            |                                                            |                                                             |                                                                 |                                                            |                                                             |                                                            |                                                             |                                                            |
|                                     | 0 min                                                                                                              | 1 min                                                      |                                                            | 3 min                                                      |                                                             | 5 min                                                           |                                                            | 10 min                                                      |                                                            | 15 min                                                      |                                                            |
|                                     |                                                                                                                    | 0.5                                                        | 1.5                                                        | 0.5                                                        | 1.5                                                         | 0.5                                                             | 1.5                                                        | 0.5                                                         | 1.5                                                        | 0.5                                                         | 1.5                                                        |
| <i>Pseudomonas fluorescens</i>      | 2.0×10 <sup>9</sup><br>±9.6×10 <sup>8</sup><br>R:na                                                                | 4.4×10 <sup>9</sup><br>±3.4×10 <sup>9</sup><br>R:nr        | 7.4×10 <sup>8</sup><br>±2.6×10 <sup>8</sup><br>R:63.5±6.8a | 1.4×10 <sup>9</sup><br>±2.1×10 <sup>8</sup><br>R:33.3±9.9b | 3.4×10 <sup>8</sup><br>±1.1×10 <sup>8</sup><br>R:83.3±5.2c  | 1.1×10 <sup>9</sup><br>±5.0×10 <sup>8</sup><br>R:48.1±8.5b<br>d | 4.2×10 <sup>8</sup><br>±1.2×10 <sup>8</sup><br>R:79.3±3.3c | 1.3×10 <sup>9</sup><br>±4.2×10 <sup>8</sup><br>R:35.8±8.9b  | 3.5×10 <sup>8</sup><br>±1.7×10 <sup>8</sup><br>R:82.7±5.5c | 1.5×10 <sup>9</sup><br>±5.0×10 <sup>8</sup><br>R:28.4±8.7b  | 4.9×10 <sup>8</sup><br>±2.1×10 <sup>8</sup><br>R:75.8±2.9c |
| <i>Staphylococcus warneri</i>       | 8.4×10 <sup>8</sup><br>±1.9×10 <sup>8</sup><br>R:na                                                                | 3.9×10 <sup>7</sup><br>±8.4×10 <sup>6</sup><br>R:95.4±0.5a | 3.2×10 <sup>5</sup><br>±3.4×10 <sup>5</sup><br>R:99.9±0.2b | 4.5×10 <sup>7</sup><br>±1.7×10 <sup>7</sup><br>R:94.6±1.9a | 9.3×10 <sup>4</sup><br>±1.3×10 <sup>4</sup><br>R:99.9±0.2b  | 3.6×10 <sup>7</sup><br>±4.2×10 <sup>6</sup><br>R:95.8±2.0a      | 9.7×10 <sup>4</sup><br>±1.8×10 <sup>4</sup><br>R:99.9±0.3b | 4.8×10 <sup>7</sup><br>±2.1×10 <sup>7</sup><br>R:94.4±2.2a  | 8.7×10 <sup>4</sup><br>±7.8×10 <sup>3</sup><br>R:99.9±0.3b | 6.1×10 <sup>7</sup><br>±3.5×10 <sup>7</sup><br>R:92.8±1.9a  | 8.0×10 <sup>4</sup><br>±7.1×10 <sup>2</sup><br>R:99.9±0.3b |
| <i>Bacillus megaterium</i>          | 2.2×10 <sup>9</sup><br>5.0×10 <sup>8</sup><br>R:na                                                                 | 1.0×10 <sup>7</sup><br>±4.3×10 <sup>5</sup><br>R:99.5±1.0a | 5.0×10 <sup>3</sup><br>±4.2×10 <sup>3</sup><br>R:99.9±0.4a | 1.0×10 <sup>7</sup><br>±1.1×10 <sup>6</sup><br>R:99.5±0.8a | 4.5×10 <sup>3</sup><br>±5.0×10 <sup>3</sup><br>R:99.9±0.8a  | 2.7×10 <sup>7</sup><br>±8.5×10 <sup>5</sup><br>R:98.7±0.6a      | 2.0×10 <sup>3</sup><br>±1.4×10 <sup>3</sup><br>R:99.9±0.4a | 6.0×10 <sup>6</sup><br>±2.1×10 <sup>5</sup><br>R:99.7±0.3a  | 1.5×10 <sup>3</sup><br>±7.1×10 <sup>2</sup><br>R:99.9±0.1a | 9.1×10 <sup>6</sup><br>±2.1×10 <sup>5</sup><br>R:99.6±0.2a  | 1.0×10 <sup>3</sup><br>±0.0<br>R:99.9±0.0a                 |
| <i>Bullera alba</i>                 | 6.2×10 <sup>7</sup><br>±8.0×10 <sup>6</sup><br>R:na                                                                | 0.0±0.0<br>R:100±0.0a                                      | 0.0±0.0<br>R:100±0.0a                                      | 0.0±0.0<br>R:100±0.0a                                      | 0.0±0.0<br>R:100±0.0a                                       | 0.0±0.0<br>R:100±0.0a                                           | 0.0±0.0<br>R:100±0.0a                                      | 0.0±0.0<br>R:100±0.0a                                       | 0.0±0.0<br>R:100±0.0a                                      | 0.0±0.0<br>R:100±0.0a                                       | 0.0±0.0<br>R:100±0.0a                                      |
| <i>Rhodotorula babjevae</i>         | 1.3×10 <sup>8</sup><br>±3.4×10 <sup>6</sup><br>R:na                                                                | 0.0±0.0<br>R:100±0.0a                                      | 0.0±0.0<br>R:100±0.0a                                      | 0.0±0.0<br>R:100±0.0a                                      | 0.0±0.0<br>R:100±0.0a                                       | 0.0±0.0<br>R:100±0.0a                                           | 0.0±0.0<br>R:100±0.0a                                      | 0.0±0.0<br>R:100±0.0a                                       | 0.0±0.0<br>R:100±0.0a                                      | 0.0±0.0<br>R:100±0.0a                                       | 0.0±0.0<br>R:100±0.0a                                      |
| <i>Cladosporium cladosporioides</i> | 8.5×10 <sup>5</sup><br>±1.2×10 <sup>5</sup><br>R:na                                                                | 7.5×10 <sup>5</sup><br>±1.3×10 <sup>5</sup><br>R:11.7±7.5a | 6.5×10 <sup>4</sup><br>±1.7×10 <sup>4</sup><br>R:92.4±3.5b | 4.2×10 <sup>5</sup><br>±1.8×10 <sup>5</sup><br>R:50.8±9.1c | 3.8×10 <sup>4</sup><br>±1.6×10 <sup>4</sup><br>R:95.6±1.7bd | 2.9×10 <sup>5</sup><br>±1.7×10 <sup>5</sup><br>R:65.9±2.6e      | 3.5×10 <sup>4</sup><br>±1.8×10 <sup>4</sup><br>R:96.0±1.8d | 3.1×10 <sup>5</sup><br>±6.5×10 <sup>4</sup><br>R:64.1±9.3ef | 3.2×10 <sup>4</sup><br>±8.6×10 <sup>3</sup><br>R:96.2±1.4d | 2.9×10 <sup>5</sup><br>±5.7×10 <sup>4</sup><br>R:65.9±3.3ef | 2.7×10 <sup>4</sup><br>±1.1×10 <sup>4</sup><br>R:96.8±1.2d |
| <i>Epicoccum nigrum</i>             | 6.1×10 <sup>3</sup><br>±2.2×10 <sup>3</sup><br>R:na                                                                | 2.3×10 <sup>3</sup><br>±1.3×10 <sup>3</sup><br>R:63.0±3.5a | 1.0×10 <sup>2</sup><br>±0.0<br>R:98.4±0.7b                 | 1.0×10 <sup>3</sup><br>±6.9×10 <sup>2</sup><br>R:83.1±7.5c | 1.0×10 <sup>2</sup><br>±0.0<br>R:98.4±0.8b                  | 5.8×10 <sup>2</sup><br>±3.1×10 <sup>2</sup><br>R:90.5±4.2c      | 1.0×10 <sup>2</sup><br>±0.0<br>R:98.4±0.8b                 | 6.0×10 <sup>2</sup><br>±8.2×10 <sup>1</sup><br>R:90.1±5.8c  | 1.0×10 <sup>2</sup><br>±0.0<br>R:98.4±0.8b                 | 5.8×10 <sup>2</sup><br>±3.1×10 <sup>2</sup><br>R:90.5±4.2c  | 1.0×10 <sup>2</sup><br>±0.0<br>R:98.4±0.8b                 |
| Mix                                 | 9.0×10 <sup>5</sup><br>±7.5×10 <sup>4</sup><br>R:na                                                                | 1.5×10 <sup>4</sup><br>±4.0×10 <sup>3</sup><br>R:73.3±5.8a | 2.4×10 <sup>5</sup><br>±1.4×10 <sup>5</sup><br>R:98.3±1.2b | 4.6×10 <sup>3</sup><br>±2.2×10 <sup>3</sup><br>R:73.3±6.9a | 2.0×10 <sup>5</sup><br>±7.8×10 <sup>4</sup><br>R:99.5±0.2b  | 4.4×10 <sup>3</sup><br>±8.8×10 <sup>2</sup><br>R:64.4±9.9a      | 3.2×10 <sup>5</sup><br>±1.3×10 <sup>5</sup><br>R:99.5±0.2b | 4.0×10 <sup>3</sup><br>±8.3×10 <sup>2</sup><br>R:72.1±6.6a  | 2.5×10 <sup>5</sup><br>±5.6×10 <sup>4</sup><br>R:99.6±1.5b | 4.0×10 <sup>3</sup><br>±9.2×10 <sup>2</sup><br>R:76.9±7.5a  | 2.1×10 <sup>5</sup><br>±8.3×10 <sup>4</sup><br>R:99.6±0.5b |

mean ± standard deviation, samples' number N=3; R: reduction of microorganisms number; na- not applicated (control sample); R ≥ 99% (3 units on a logarithmic scale) – high antimicrobial activity; R = 90 – 98% (2 units on a logarithmic scale) – average antimicrobial activity; R = 50 – 89% (< 1 unit on a logarithmic scale) low antimicrobial activity; R < 50 – lack of antimicrobial activity, nr – no reduction; statistically different samples are marked with different letters within the same row (a,b,c,d,e,f) (Tukey's post hoc test at a significance level of 0.05)

Table S2. Microorganisms number after 15 min. ozonation process with different ozone and organic compounds concentration

| Microorganisms<br>from parsley      | microorganisms number [CFU ml <sup>-1</sup> ] after 5 min. ozonation with 2 ozone doses [0.5 and 1.5 mg L <sup>-1</sup> ]<br>R: reduction of microorganisms number [%] |                                                            |                                                            |                                                            |                                                            |                                                             |                                                            |                                                            |                                                            |
|-------------------------------------|------------------------------------------------------------------------------------------------------------------------------------------------------------------------|------------------------------------------------------------|------------------------------------------------------------|------------------------------------------------------------|------------------------------------------------------------|-------------------------------------------------------------|------------------------------------------------------------|------------------------------------------------------------|------------------------------------------------------------|
|                                     | before                                                                                                                                                                 |                                                            |                                                            | after ozonation                                            |                                                            |                                                             |                                                            |                                                            |                                                            |
|                                     | organic compounds concentration [%]                                                                                                                                    |                                                            |                                                            |                                                            |                                                            |                                                             |                                                            |                                                            |                                                            |
|                                     | 0 %                                                                                                                                                                    | 0.1%                                                       |                                                            | 1.0%                                                       |                                                            | 10.0%                                                       |                                                            | 50.0%                                                      |                                                            |
|                                     |                                                                                                                                                                        | 0.5 mg L <sup>-1</sup>                                     | 1.5 mg L <sup>-1</sup>                                     | 0.5 mg L <sup>-1</sup>                                     | 1.5 mg L <sup>-1</sup>                                     | 0.5 mg L <sup>-1</sup>                                      | 1.5 mg L <sup>-1</sup>                                     | 0.5 mg L <sup>-1</sup>                                     | 1.5 mg L <sup>-1</sup>                                     |
| <i>Pseudomonas fluorescens</i>      | 2.0×10 <sup>9</sup><br>±9.6×10 <sup>8</sup><br>R:na                                                                                                                    | 1.1×10 <sup>7</sup><br>±3.6×10 <sup>5</sup><br>R:99.5±0.1a | 3.2×10 <sup>6</sup><br>±1.4×10 <sup>5</sup><br>R:99.9±0.1b | 1.1×10 <sup>7</sup><br>±1.5×10 <sup>6</sup><br>R:99.5±0.2a | 8.7×10 <sup>6</sup><br>±3.6×10 <sup>5</sup><br>R:99.9±0.1b | 1.9×10 <sup>7</sup><br>±5.0×10 <sup>5</sup><br>R:99.1±0.2a  | 1.1×10 <sup>7</sup><br>±3.5×10 <sup>5</sup><br>R:99.5±0.2a | 1.8×10 <sup>7</sup><br>±8.5×10 <sup>5</sup><br>R:99.1±0.4a | 7.8×10 <sup>6</sup><br>±7.8×10 <sup>5</sup><br>R:99.9±0.1b |
| <i>Staphylococcus warneri</i>       | 8.4×10 <sup>8</sup><br>±1.9×10 <sup>8</sup><br>R:na                                                                                                                    | 1.6×10 <sup>7</sup><br>±9.2×10 <sup>5</sup><br>R:98.1±0.1a | 1.3×10 <sup>6</sup><br>±7.1×10 <sup>4</sup><br>R:99.9±0.1b | 2.7×10 <sup>7</sup><br>±8.5×10 <sup>5</sup><br>R:96.8±0.3c | 2.7×10 <sup>7</sup><br>±1.1×10 <sup>6</sup><br>R:96.8±1.2c | 3.5×10 <sup>7</sup><br>±1.3×10 <sup>6</sup><br>R:95.8±2.5c  | 3.5×10 <sup>7</sup><br>±5.1×10 <sup>6</sup><br>R:95.9±3.3c | 2.3×10 <sup>7</sup><br>±2.1×10 <sup>5</sup><br>R:97.3±2.1c | 1.4×10 <sup>7</sup><br>±2.5×10 <sup>6</sup><br>R:98.3±0.5c |
| <i>Bacillus megaterium</i>          | 2.2×10 <sup>9</sup><br>±5.0×10 <sup>8</sup><br>R:na                                                                                                                    | 3.6×10 <sup>5</sup><br>±5.7×10 <sup>3</sup><br>R:99.9±0.1a | 3.5×10 <sup>3</sup><br>±7.1×10 <sup>2</sup><br>R:99.9±0.1a | 3.9×10 <sup>5</sup><br>±4.2×10 <sup>3</sup><br>R:99.9±0.1a | 4.2×10 <sup>5</sup><br>±3.3×10 <sup>4</sup><br>R:99.9±0.1a | 4.2×10 <sup>5</sup><br>±1.3×10 <sup>4</sup><br>R:99.9±0.1a  | 4.1×10 <sup>5</sup><br>±1.7×10 <sup>4</sup><br>R:99.9±0.1a | 3.2×10 <sup>5</sup><br>±4.9×10 <sup>3</sup><br>R:99.9±0.1a | 3.1×10 <sup>5</sup><br>±2.7×10 <sup>4</sup><br>R:99.9±0.1a |
| <i>Cladosporium cladosporioides</i> | 2.1×10 <sup>7</sup><br>±4.9×10 <sup>6</sup><br>R:na                                                                                                                    | 1.2×10 <sup>7</sup><br>±1.7×10 <sup>6</sup><br>R:42.4±9.2a | 4.3×10 <sup>6</sup><br>±2.5×10 <sup>5</sup><br>R:79.7±4.2b | 1.4×10 <sup>7</sup><br>±7.9×10 <sup>5</sup><br>R:36.4±7.3a | 7.6×10 <sup>6</sup><br>±5.4×10 <sup>5</sup><br>R:64.4±4.8c | 1.3×10 <sup>7</sup><br>±4.4×10 <sup>6</sup><br>R: 41.2±6.1a | 7.6×10 <sup>6</sup><br>±4.6×10 <sup>5</sup><br>R:64.2±5.9c | 3.1×10 <sup>7</sup><br>±1.2×10 <sup>6</sup><br>R:nr        | 2.3×10 <sup>7</sup><br>±2.6×10 <sup>6</sup><br>R:nr        |
| <i>Bullera alba</i>                 | 6.2×10 <sup>7</sup><br>±8.1×10 <sup>6</sup><br>R:na                                                                                                                    | 1.0×10 <sup>6</sup><br>±2.2×10 <sup>5</sup><br>R:98.4±1.5a | 0.0<br>±0.0<br>R:100±0.0b                                  | 4.3×10 <sup>7</sup><br>±6.8×10 <sup>6</sup><br>R:30.3±8.8c | 3.3×10 <sup>7</sup><br>±5.7×10 <sup>6</sup><br>R:47.6±7.3d | 9.5×10 <sup>7</sup><br>±8.7×10 <sup>6</sup><br>R: nr        | 3.3×10 <sup>7</sup><br>±7.2×10 <sup>5</sup><br>R:47.1±6.3d | 1.2×10 <sup>8</sup><br>±1.6×10 <sup>7</sup><br>R:nr        | 6.4×10 <sup>7</sup><br>±5.9×10 <sup>6</sup><br>R:nr        |
| <i>Rhodotorula babjevae</i>         | 1.3×10 <sup>8</sup><br>±3.4×10 <sup>6</sup><br>R:na                                                                                                                    | 3.9×10 <sup>6</sup><br>±1.7×10 <sup>5</sup><br>R:97.1±2.0a | 4.5×10 <sup>4</sup><br>±5.9×10 <sup>3</sup><br>R:99.9±0.1b | 1.1×10 <sup>8</sup><br>±5.2×10 <sup>6</sup><br>R:19.6±6.4c | 4.5×10 <sup>7</sup><br>±6.7×10 <sup>6</sup><br>R:66.2±2.2d | 1.9×10 <sup>8</sup><br>±2.0×10 <sup>7</sup><br>R: nr        | 4.0×10 <sup>7</sup><br>±8.2×10 <sup>6</sup><br>R:70.2±5.3d | 1.7×10 <sup>8</sup><br>±8.1×10 <sup>6</sup><br>R:nr        | 2.2×10 <sup>8</sup><br>±1.4×10 <sup>7</sup><br>R:nr        |
| Mix                                 | 9.0×10 <sup>5</sup><br>±7.5×10 <sup>4</sup><br>R:na                                                                                                                    | 4.3×10 <sup>5</sup><br>±1.3×10 <sup>5</sup><br>R:52.1±8.8a | 7.8×10 <sup>4</sup><br>±4.8×10 <sup>3</sup><br>R:91.3±0.5b | 4.9×10 <sup>5</sup><br>±1.5×10 <sup>5</sup><br>R:44.9±9.6a | 3.3×10 <sup>5</sup><br>±1.8×10 <sup>5</sup><br>R:63.3±7.3c | 6.2×10 <sup>5</sup><br>±4.2×10 <sup>5</sup><br>R:31.2±8.1a  | 5.1×10 <sup>5</sup><br>±3.3×10 <sup>5</sup><br>R:43.7±4.9a | 1.5×10 <sup>6</sup><br>±9.9×10 <sup>4</sup><br>R:nr        | 8.0×10 <sup>5</sup><br>±2.7×10 <sup>5</sup><br>R:10.9±9.9d |

mean ± standard deviation, samples' number N=3; R: reduction of microorganisms number; na- not applicated (control sample); R ≥ 99% (3 units on a logarithmic scale) – high antimicrobial activity; R = 90 – 98% (2 units on a logarithmic scale) – average antimicrobial activity; R = 50 – 89% (< 1 unit on a logarithmic scale) low antimicrobial activity; R < 50 – lack of antimicrobial activity, nr – no reduction, statistically different samples are marked with different letters within the same row (a,b,c,d) (Tukey's post hoc test at a significance level of 0.05)

Table S3. Microorganisms (fungi and bacteria) number in parsley rising ozonated water (ozone concentration 1.5 mg L<sup>-1</sup>) in closed circuit during process time

| Water rising /<br>parsley mass [g L <sup>-1</sup> ] | microorganisms number in parsley samples [CFU ml <sup>-1</sup> ]; R: reduction of microorganisms number [%]<br>during process time [min] |                                                     |                                                            |                                                            |                                                            |                                                            |                                                            |                                                            |                                                            |                                                            |
|-----------------------------------------------------|------------------------------------------------------------------------------------------------------------------------------------------|-----------------------------------------------------|------------------------------------------------------------|------------------------------------------------------------|------------------------------------------------------------|------------------------------------------------------------|------------------------------------------------------------|------------------------------------------------------------|------------------------------------------------------------|------------------------------------------------------------|
|                                                     | F                                                                                                                                        | B                                                   | F                                                          | B                                                          | F                                                          | B                                                          | F                                                          | B                                                          | F                                                          | B                                                          |
|                                                     | before                                                                                                                                   |                                                     |                                                            |                                                            | after ozonation                                            |                                                            |                                                            |                                                            |                                                            |                                                            |
|                                                     | 0 min                                                                                                                                    |                                                     | 3 min                                                      |                                                            | 5 min                                                      |                                                            | 10 min                                                     |                                                            | 15 min                                                     |                                                            |
| Tap water (control)/ 25 g                           | 2.7×10 <sup>4</sup><br>±7.6×10 <sup>3</sup><br>R:na                                                                                      | 1.4×10 <sup>4</sup><br>±2.8×10 <sup>3</sup><br>R:na | 2.7×10 <sup>4</sup><br>±1.0×10 <sup>4</sup><br>R:nr        | 1.9×10 <sup>4</sup><br>±5.0×10 <sup>3</sup><br>R:nr        | 2.9×10 <sup>4</sup><br>±7.2×10 <sup>3</sup><br>R:nr        | 1.5×10 <sup>4</sup><br>±7.1×10 <sup>2</sup><br>R:nr        | 2.1×10 <sup>4</sup><br>±2.2×10 <sup>4</sup><br>R:23.3±8.9a | 1.1×10 <sup>4</sup><br>±1.2×10 <sup>4</sup><br>R:23.9±6.3a | 1.7×10 <sup>4</sup><br>±9.5×10 <sup>3</sup><br>R:37.6±3.9b | 9.6×10 <sup>3</sup><br>±1.2×10 <sup>4</sup><br>R:31.4±7.7b |
| Ozonated water/ 25 g                                | 5.6×10 <sup>4</sup><br>±2.8×10 <sup>3</sup><br>R:na                                                                                      | 1.4×10 <sup>4</sup><br>±2.8×10 <sup>3</sup><br>R:na | 2.0×10 <sup>2</sup><br>±4.0×10 <sup>2</sup><br>R:99.3±0.1a | 1.0×10 <sup>3</sup><br>±0.0<br>R:98.2±1.2a                 | 0.0<br>±0.0<br>R:100±0.0b                                  | 1.0×10 <sup>3</sup><br>±0.0<br>R:98.2±0.5a                 | 0.0<br>±0.0<br>R:100±0.0b                                  | 0.0<br>±0.0<br>R:100±0.0b                                  | 0.0<br>±0.0<br>R:100±0.0b                                  | 0.0<br>±0.0<br>R:100±0.0b                                  |
| Ozonated water / 50 g                               | 7.5×10 <sup>5</sup><br>±2.4×10 <sup>5</sup><br>R:na                                                                                      | 4.5×10 <sup>9</sup><br>±3.7×10 <sup>9</sup><br>R:na | 8.7×10 <sup>3</sup><br>±4.3×10 <sup>3</sup><br>R:98.8±0.5a | 6.7×10 <sup>4</sup><br>±3.1×10 <sup>4</sup><br>R:99.9±0.1b | 2.2×10 <sup>4</sup><br>±5.5×10 <sup>3</sup><br>R:97.0±0.5c | 2.9×10 <sup>4</sup><br>±6.4×10 <sup>3</sup><br>R:99.9±0.1b | 7.0×10 <sup>3</sup><br>±1.2×10 <sup>3</sup><br>R:99.1±0.2a | 1.0×10 <sup>5</sup><br>±1.2×10 <sup>4</sup><br>R:99.9±0.1b | 2.9×10 <sup>3</sup><br>±1.3×10 <sup>3</sup><br>R:99.6±0.1d | 1.1×10 <sup>5</sup><br>±1.8×10 <sup>4</sup><br>R:99.9±0.1b |
| Ozonated water / 75 g                               | 1.6×10 <sup>6</sup><br>±9.1×10 <sup>5</sup><br>R:na                                                                                      | 1.3×10 <sup>7</sup><br>±2.1×10 <sup>5</sup><br>R:na | 2.2×10 <sup>5</sup><br>±1.4×10 <sup>5</sup><br>R:86.5±3.3a | 1.4×10 <sup>6</sup><br>±2.1×10 <sup>5</sup><br>R:89.9±2.7a | 1.5×10 <sup>4</sup><br>±3.2×10 <sup>3</sup><br>R:99.1±0.2b | 4.4×10 <sup>4</sup><br>±7.8×10 <sup>3</sup><br>R:99.7±0.3c | 7.1×10 <sup>3</sup><br>±2.1×10 <sup>3</sup><br>R:99.6±0.2c | 2.9×10 <sup>4</sup><br>±3.5×10 <sup>3</sup><br>R:99.8±0.1c | 1.1×10 <sup>3</sup><br>±3.4×10 <sup>3</sup><br>R:99.3±0.3c | 3.0×10 <sup>4</sup><br>±1.4×10 <sup>4</sup><br>R:99.8±0.1c |
| Ozonated water / 100 g                              | 1.4×10 <sup>6</sup><br>±1.7×10 <sup>5</sup><br>R:na                                                                                      | 1.6×10 <sup>7</sup><br>±7.1×10 <sup>4</sup><br>R:na | 2.4×10 <sup>4</sup><br>±3.4×10 <sup>3</sup><br>R:98.3±0.1a | 1.4×10 <sup>5</sup><br>±1.3×10 <sup>4</sup><br>R:99.2±0.2b | 2.2×10 <sup>4</sup><br>±1.0×10 <sup>4</sup><br>R:98.5±0.4a | 2.1×10 <sup>5</sup><br>±1.8×10 <sup>4</sup><br>R:98.7±0.3a | 1.3×10 <sup>4</sup><br>±3.6×10 <sup>3</sup><br>R:99.1±0.1b | 4.6×10 <sup>4</sup><br>±5.7×10 <sup>3</sup><br>R:99.7±0.1c | 8.5×10 <sup>3</sup><br>±6.1×10 <sup>3</sup><br>R:99.4±0.2b | 8.2×10 <sup>4</sup><br>±1.4×10 <sup>3</sup><br>R:99.5±0.1b |

mean ± standard deviation, samples' number N=3; Fungi (F); Bacteria (B) ; R: reduction of microorganisms number; na- not applicated (control sample); R ≥ 99% (3 units on a logarithmic scale) – high antimicrobial activity; R = 90 – 98% (2 units on a logarithmic scale) – average antimicrobial activity; R = 50 – 89% (< 1 unit on a logarithmic scale) low antimicrobial activity; R < 50 – lack of antimicrobial activity, nr – no reduction, statistically different samples are marked with different letters within the same row (a,b,c,d) (Tukey's post hoc test at a significance level of 0.05)
